# Supplementary material for: Prospective Study of the Phenotypic and Mutational Spectrum of Ocular Albinism and Oculocutaneous Albinism
Source: PubMed Central journal article supplement (PMC8065601; doi:10.3390/genes12040508), 2021-03-30
Supplement: genes-12-00508-s001.pdf [file genes-12-00508-s001.pdf]

**Table S1.** Overview of the patient demographics and clinical phenotype. Mutations shaded in grey are inconclusive.

Family history (FH), Transillumination defect (TID), Unaffected (U), Affected (A), Present (P), Absent (-), Inconclusive (I), Declined (D), Fixing & following (FF).

| Family ID | Gender | F<br>H | Ethnicity                 | Consanguinity | Hair &<br>skin | VA   | Nystagmus | Iris TID | Foveal<br>hypoplasia | Fundus<br>hypopigmentation | Chiasmal<br>misrouting |
|-----------|--------|--------|---------------------------|---------------|----------------|------|-----------|----------|----------------------|----------------------------|------------------------|
| 25544     | M      | -      | African                   | -             | U              | 0.74 | P         | -        | P                    | -                          | P                      |
| 25578     | F      | -      | Mixed: White /<br>African | -             | U              | 0.2  | P         | -        | -                    | P                          | P                      |
| 25704     | M      | -      | Mixed: White /<br>Asian   | -             | U              | 1.12 | P         | -        | -                    | P                          | P                      |
| 25806     | M      | P      | African                   | -             | U              | 0.7  | P         | -        | P                    | -                          | P                      |
| 25888-1   | F      | P      | African                   | -             | U              | 0.3  | -         | P        | P                    | P                          | I                      |
| 25888-2   | F      | P      | African                   | -             | U              | 0.3  | -         | P        | P                    | P                          | P                      |
| 26015     | M      | -      | White other               | -             | U              | 0.78 | P         | -        | -                    | -                          | P                      |
| 26065     | M      | -      | White other               | -             | U              | 0.1  | P         | -        | -                    | P                          | P                      |
| 26261     | F      | -      | South Asian               | -             | U              | 0.58 | P         | -        | P                    | -                          | P                      |
| 26352     | F      | -      | Middle Eastern            | -             | A              | 0.5  | P         | P        | P                    | P                          | D                      |
| 26640     | F      | -      | South Asian               | -             | U              | 0.6  | P         | -        | P                    | P                          | P                      |
| 26641     | F      | -      | White other               | -             | U              | 0.6  | P         | -        | P                    | P                          | P                      |
| 26680     | M      | -      | White British             | -             | U              | 0.64 | -         | P        | P                    | P                          | P                      |
| 26677     | M      | -      | South Asian               | -             | A              | 0.6  | P         | P        | P                    | -                          | P                      |
| 25246     | F      | P      | Middle Eastern            | -             | U              | 0.4  | P         | -        | P                    | P                          | P                      |
| 26649     | M      | -      | White British             | -             | A              | 0.54 | P         | P        | P                    | P                          | P                      |
| 26847     | M      | -      | South Asian               | P             | U              | 0.8  | P         | P        | P                    | P                          | P                      |
| 26876     | M      | -      | Mixed: White /<br>African | -             | U              | 0.6  | P         | P        | P                    | P                          | P                      |
| 26905     | F      | -      | South Asian               | -             | A              | FF   | P         | -        | P                    | P                          | P                      |
| 26948-1   | F      | P      | Mixed: White /<br>African | -             | A              | 0.15 | -         | -        | -                    | -                          | P                      |
| 26948-2   | F      | P      | Mixed: White /<br>African | -             | A              | 0.1  | -         | -        | -                    | -                          | P                      |
| 26947     | F      | -      | Mixed: White /<br>African | -             | A              | 0.3  | P         | -        | -                    | -                          | P                      |
| 26984     | F      | -      | Black African             | -             | U              | 0.7  | P         | -        | P                    | -                          | P                      |
| 27099     | M      | -      | Black African             | -             | U              | 1.12 | P         | -        | -                    | -                          | P                      |
| 27101     | M      | -      | Black African             | -             | U              | 0.44 | P         | -        | -                    | -                          | P                      |
| 23192-1   | F      | P      | South Asian               | -             | A              | FF   | P         | P        | P                    | P                          | I                      |
| 23192-2   | F      | P      | South Asian               | -             | A              | 0.84 | P         | P        | P                    | P                          | P                      |
| 23192-3   | M      | P      | South Asian               | -             | A              | 0.2  | -         | P        | P                    | P                          | P                      |
| 27268     | M      | -      | White British             | -             | U              | 0.2  | P         | -        | P                    | P                          | P                      |
| 27321     | M      | P      | Black African             | -             | A              | 1.2  | P         | P        | P                    | P                          | P                      |

|       |   |   |                        |   |   |      |   |   |   |   |   |
|-------|---|---|------------------------|---|---|------|---|---|---|---|---|
| 27432 | F | - | White other            | - | U | 0.26 | P | - | - | P | - |
| 27431 | F | - | White other            | - | A | 0.4  | P | P | P | P | P |
| 27455 | M | - | White British          | - | U | 0.38 | P | - | P | P | D |
| 27451 | M | - | African                | P | U | 0.6  | P | - | P | P | P |
| 27560 | M | - | White British          | - | U | 0.2  | P | P | P | P | D |
| 27655 | M | - | South Asian            | P | U | 0.3  | P | - | - | - | P |
| 26903 | F | P | South Asian            | P | U | 1.0  | P | P | P | P | D |
| 26956 | F | - | White British          | - | U | 0.6  | P | P | P | P | - |
| 27033 | F | - | White British          | - | A | 0.3  | P | P | P | P | P |
| 27047 | M | - | Mixed: White / African | - | A | 0.6  | P | P | P | P | P |
| 27079 | M | - | White British          | - | U | 1.0  | P | P | P | P | P |
| 13332 | M | - | White British          | - | A | 1.0  | P | P | P | P | D |
| 27430 | F | - | White British          | - | U | 0.6  | P | P | P | P | D |
| 22151 | M | P | White British          | - | A | 0.78 | P | P | P | P | D |

---
